# Supplementary material
Source: PubMed Central journal article supplement (PMC7476782)
Supplement: NIHMS1616964-supplement-1.pdf [file NIHMS1616964-supplement-1.pdf]

## Quality Assessment Tool

Adapted from Hoppen & Chalder (2018) and the National Heart, Blood, and Lung institute Quality Assessment Tool (n.d.)

- (1) Study design
  - score 1: cross-sectional design
  - score 2: longitudinal design OR use of non-maltreated comparison group
  - score 3: Prospective cohort
  
- (2) Information about the sample and sampling procedure (e.g., study sample clearly defined and described, description of how sample was recruited, some justification for selected sample is helpful; priority to demographic and SES data)
  - Score 0: insufficient
  - Score 1: minimally sufficient
  - Score 2: sufficient
  
- (3) Operationalization of childhood maltreatment (score up if more than one)
  - Score 0: unvalidated measure(s)
  - Score 1: validated (or objective) retrospective self-report questionnaire(s)
  - Score 2: contemporaneous validated measure(s)
  - Score 3: contemporaneous clinical/public records
  
- (4) Child maltreatment assessment includes multiple types of childhood maltreatment
  - Score 0: single maltreatment type assessed
  - Score 1: multiple maltreatment types assessed
  
- (5) Operationalization of parenting behavior(s) (score up if more than one)
  - Score 0: unvalidated measure(s)
  - Score 1: validated (or objective) self-report questionnaire(s)
  - Score 2: interview or other reporter (e.g., child report)
  - Score 3: observed parenting or clinical/public records
  
- (6) Operationalization of moderator(s)/mediator(s) – if applicable (code n/a if no mediator or moderator)
  - Score 0: unvalidated operationalization
  - Score 1: valid or objective operationalization
  
- (7) Appropriate statistical analysis (e.g., sufficient data presented; findings explicitly described and explained; potential confounding variables assessed and evaluated)
  - Score 0: inappropriate
  - Score 1: appropriate but insufficient information
    - OR lack of control for significant cofounds (including solely bivariate associations)
  - Score 2: appropriate

| Authors                                                         | Study Design<br>(1-3) | Sample<br>(0-2) | CM Variable<br>(0-3) | CM Sing/Mult<br>(0-1) | Parenting Variable<br>(0-3) | Mediators/<br>Moderators<br>(0-1) | Statistical Analyses<br>(0-2) | Total Score | Possible Score | Quality Score<br>(total/possible<br>* 100) |
|-----------------------------------------------------------------|-----------------------|-----------------|----------------------|-----------------------|-----------------------------|-----------------------------------|-------------------------------|-------------|----------------|--------------------------------------------|
| Al Dosari, Ferwana, Abdulmajeed, Aldossari, & Al-Zahrani (2017) | 1                     | 2               | 1                    | 1                     | 1                           | na                                | 2                             | 8           | 14             | 57.14                                      |
| Alexander, Teti, & Anderson, (2000)                             | 1                     | 2               | 0                    | 1                     | 1                           | 0                                 | 2                             | 7           | 15             | 46.67                                      |
| Ammerman et al., (2013)                                         | 1                     | 2               | 1                    | 1                     | 1                           | 1                                 | 2                             | 9           | 15             | 60.00                                      |
| Augustyn, Thornberry, & Henry (2019)                            | 3                     | 2               | 3                    | 1                     | 3                           | 1                                 | 2                             | 15          | 15             | 100.00                                     |
| Bailey, DeOliveira, Wolfe, Evans, & Hartwick (2012)             | 1                     | 2               | 1                    | 1                     | 3                           | na                                | 2                             | 10          | 14             | 71.43                                      |
| Banyard (1997)                                                  | 2                     | 2               | 0                    | 1                     | 1                           | na                                | 2                             | 8           | 14             | 57.14                                      |
| Banyard, Williams, & Siegel (2003)                              | 3                     | 2               | 3                    | 1                     | 1                           | 1                                 | 2                             | 13          | 15             | 86.67                                      |
| Barrett (2009)                                                  | 1                     | 2               | 2                    | 1                     | 1                           | na                                | 2                             | 9           | 14             | 64.29                                      |
| Barrett (2010)                                                  | 1                     | 2               | 0                    | 1                     | 1                           | 1                                 | 2                             | 8           | 15             | 53.33                                      |
| Beckerman, van Berkel, Mesman, & Alink (2017)                   | 1                     | 2               | 1                    | 1                     | 1                           | 0                                 | 1                             | 7           | 14             | 50.00                                      |
| Ben-David, Jonson-Reid, Drake, & Kohl, (2015)                   | 3                     | 2               | 3                    | 1                     | 3                           | na                                | 2                             | 14          | 14             | 100.00                                     |
| Ben Shlomo & Ben Haim (2017)                                    | 1                     | 1               | 1                    | 1                     | 1                           | na                                | 2                             | 7           | 14             | 50.00                                      |
| Bert, Guner, & Lanzi (2009)                                     | 1                     | 2               | 1                    | 1                     | 1                           | na                                | 2                             | 8           | 14             | 57.14                                      |
| Burkett (1991)                                                  | 2                     | 1               | 0                    | 0                     | 3                           | na                                | 1                             | 7           | 14             | 50.00                                      |
| Caldwell, Shaver, Li, & Minzenberg, (2011)                      | 1                     | 2               | 1                    | 1                     | 1                           | 1                                 | 2                             | 9           | 15             | 60.00                                      |
| Capaldi, Tiberio, Pears, Kerr, & Owen (2019)                    | 2                     | 2               | 1                    | 0                     | 1                           | 1                                 | 2                             | 9           | 15             | 60.00                                      |

|                                                 |   |   |   |   |   |    |   |    |    |       |
|-------------------------------------------------|---|---|---|---|---|----|---|----|----|-------|
| Cappell & Heiner (1990)                         | 1 | 1 | 0 | 1 | 2 | 1  | 1 | 7  | 15 | 46.67 |
| Chung et al. (2009)                             | 1 | 2 | 0 | 1 | 0 | 0  | 2 | 6  | 15 | 40.00 |
| Cohen, Hien, & Batchelder (2008)                | 1 | 2 | 1 | 1 | 1 | na | 2 | 8  | 14 | 57.14 |
| T. Cohen (1995)                                 | 2 | 1 | 0 | 0 | 1 | na | 1 | 8  | 14 | 57.14 |
| Cole, Woolger, Power, & Smith (1992)            | 2 | 2 | 0 | 0 | 1 | na | 2 | 7  | 14 | 50.00 |
| Collin-Vézina, Cyr, Pauzé, & McDuff (2005)      | 1 | 1 | 1 | 1 | 1 | 1  | 1 | 7  | 15 | 46.67 |
| Coohey & Braun (1997)                           | 2 | 2 | 1 | 0 | 3 | 1  | 2 | 11 | 15 | 73.33 |
| Crombach & Bambonyé (2015)                      | 1 | 1 | 0 | 0 | 0 | na | 2 | 4  | 14 | 28.57 |
| Cross et al. (2018)                             | 1 | 2 | 1 | 1 | 2 | na | 2 | 9  | 14 | 64.29 |
| Cuartas, Grogan-Kaylor, Ma, & Castillo (2019)   | 1 | 2 | 0 | 0 | 1 | na | 2 | 6  | 14 | 42.86 |
| Dayton, Huth-Bocks, & Busuito (2016)            | 2 | 2 | 1 | 1 | 3 | 1  | 2 | 12 | 15 | 80.00 |
| Deb & Adak (2006)                               | 1 | 1 | 0 | 0 | 0 | na | 1 | 3  | 14 | 21.43 |
| Dilillo, Tremblay, & Peterson (2000)            | 2 | 2 | 0 | 1 | 1 | na | 2 | 8  | 14 | 57.14 |
| Douglas (2000)                                  | 2 | 1 | 1 | 0 | 1 | na | 2 | 7  | 14 | 50.00 |
| Driscoll & Easterbrooks (2007)                  | 1 | 2 | 1 | 0 | 3 | na | 2 | 9  | 14 | 64.29 |
| Dubowitz et al. (2001)                          | 2 | 2 | 0 | 1 | 1 | na | 2 | 8  | 14 | 57.14 |
| Ehrensaft, Knous-Westfall, Cohen, & Chen (2015) | 3 | 1 | 3 | 1 | 2 | 1  | 2 | 13 | 15 | 86.67 |
| Ellonen, Peltonen, Poso, & Janson (2017)        | 1 | 2 | 0 | 0 | 1 | na | 2 | 6  | 14 | 42.86 |
| Ethier, Lacharité, & Couture (1995)             | 2 | 2 | 0 | 1 | 1 | na | 2 | 8  | 14 | 57.14 |

|                                                              |   |   |   |   |   |    |   |    |    |       |
|--------------------------------------------------------------|---|---|---|---|---|----|---|----|----|-------|
| Ferrari (2002)                                               | 1 | 2 | 1 | 1 | 1 | 1  | 2 | 9  | 14 | 64.29 |
| Fitzgerald, Shipman,<br>Jackson, McMahon, &<br>Hanley (2005) | 2 | 2 | 1 | 1 | 3 | 1  | 2 | 12 | 15 | 80.00 |
| Frías-Armenta &<br>McCloskey (1998)                          | 1 | 2 | 1 | 1 | 1 | 1  | 2 | 9  | 15 | 60.00 |
| Frias-Armenta (2002)                                         | 1 | 2 | 1 | 0 | 1 | 1  | 2 | 8  | 15 | 53.33 |
| Fuchs, Möhler, Resch, &<br>Kaess (2015)                      | 2 | 1 | 1 | 1 | 3 | 1  | 2 | 11 | 15 | 73.33 |
| Fujiwara, Okuyama, &<br>Izumi (2012)                         | 1 | 2 | 0 | 1 | 0 | na | 2 | 6  | 14 | 42.86 |
| Fulu et al. (2017)                                           | 1 | 2 | 1 | 1 | 0 | 1  | 2 | 8  | 15 | 53.33 |
| Harmer, Sanderson, &<br>Mertin (1999)                        | 1 | 1 | 1 | 1 | 1 | na | 1 | 6  | 14 | 42.86 |
| Hellmann, Stiller,<br>Glaubitz, & Kliem (2018)               | 1 | 2 | 1 | 0 | 1 | 1  | 2 | 8  | 15 | 53.33 |
| Hemenway, Solnick &<br>Carter (1994)                         | 1 | 1 | 0 | 1 | 0 | na | 1 | 4  | 14 | 28.57 |
| Herrenkohl, Klika, Brown,<br>Herrenkohl, & Leeb<br>(2013)    | 3 | 2 | 2 | 1 | 0 | 0  | 2 | 10 | 15 | 66.67 |
| Heyman & Slep (2002).                                        | 1 | 1 | 0 | 1 | 1 | na | 2 | 6  | 14 | 42.86 |
| Huth-Bocks, Muzik,<br>Beeghly, Earls, & Stacks<br>(2014)     | 2 | 2 | 1 | 1 | 3 | na | 1 | 10 | 14 | 71.43 |
| Jackson et al. (1999)                                        | 1 | 2 | 0 | 1 | 1 | na | 2 | 7  | 14 | 50.00 |
| Jaffe, Cranston, &<br>Shadlow (2012)                         | 1 | 1 | 0 | 0 | 1 | na | 1 | 4  | 14 | 28.57 |
| Jiang, Chen, Yu, & Jin<br>(2017)                             | 1 | 2 | 0 | 0 | 0 | na | 2 | 5  | 14 | 35.71 |

|                                                    |   |   |   |   |   |    |   |    |    |        |
|----------------------------------------------------|---|---|---|---|---|----|---|----|----|--------|
| Kim, Pears, Fisher, Connelly, & Landsverk (2010)   | 2 | 2 | 1 | 1 | 1 | na | 2 | 9  | 14 | 64.29  |
| Kim (2009)                                         | 1 | 2 | 0 | 1 | 0 | na | 2 | 6  | 14 | 42.86  |
| Kim, Trickett, & Putnam (2010)                     | 1 | 2 | 0 | 0 | 1 | 1  | 1 | 6  | 15 | 40.00  |
| Koren-Karie, Oppenheim, & Getzler-Yosef (2008)     | 1 | 2 | 0 | 1 | 3 | 1  | 2 | 10 | 15 | 66.67  |
| Labella, Raby, Martin, & Roisman (2019)            | 3 | 2 | 3 | 1 | 3 | 1  | 2 | 15 | 15 | 100.00 |
| Libby, Orton, Beals, Buchwald, & Manson (2008)     | 1 | 2 | 1 | 1 | 0 | 1  | 2 | 8  | 15 | 53.33  |
| Locke & Newcomb (2004)                             | 1 | 2 | 1 | 1 | 1 | 1  | 2 | 9  | 15 | 60.00  |
| Lyons-Ruth & Block (1996)                          | 2 | 1 | 1 | 1 | 3 | na | 2 | 10 | 14 | 71.43  |
| Mapp (2006)                                        | 1 | 2 | 0 | 0 | 1 | 1  | 2 | 7  | 15 | 46.67  |
| Marcenko, Kemp, & Larson (2000)                    | 1 | 2 | 1 | 1 | 1 | na | 2 | 8  | 14 | 57.14  |
| Margolin, Gordis, Medina, & Oliver (2003)          | 1 | 1 | 0 | 1 | 2 | na | 2 | 7  | 14 | 50.00  |
| McCullough, Han, Morelen, & Shaffer (2017)         | 1 | 2 | 1 | 1 | 3 | 1  | 2 | 11 | 15 | 73.33  |
| McCullough, Harding, Shaffer, Han, & Bright (2014) | 1 | 2 | 1 | 1 | 3 | na | 2 | 10 | 14 | 71.43  |
| Milaniak & Widom (2015)                            | 3 | 2 | 3 | 1 | 3 | na | 2 | 14 | 14 | 100.00 |

|                                                           |   |   |   |   |   |    |   |    |    |       |
|-----------------------------------------------------------|---|---|---|---|---|----|---|----|----|-------|
| Miranda, de la Osa, Granero, & Ezpeleta (2013)            | 1 | 2 | 1 | 1 | 1 | na | 2 | 8  | 14 | 57.14 |
| Moehler, Biringen, & Poustka (2007)                       | 2 | 1 | 1 | 1 | 3 | na | 1 | 9  | 18 | 50.00 |
| Muller (1995)                                             | 1 | 1 | 1 | 0 | 2 | 0  | 1 | 6  | 15 | 40.00 |
| Newcomb & Locke (2001)                                    | 1 | 2 | 1 | 1 | 1 | 1  | 2 | 9  | 15 | 60.00 |
| Niu, Liu, & Wang (2018)                                   | 1 | 2 | 1 | 1 | 1 | 1  | 2 | 9  | 15 | 60.00 |
| Oosterman, Schuengel, Forrer, & De Moor (2019)            | 2 | 2 | 1 | 1 | 1 | 1  | 2 | 10 | 15 | 66.67 |
| Pasalich, Cyr, Zheng, McMahon, & Spieker (2016)           | 1 | 2 | 1 | 1 | 3 | na | 2 | 10 | 14 | 71.43 |
| Pears & Capaldi (2001)                                    | 2 | 2 | 1 | 0 | 2 | 1  | 2 | 10 | 15 | 66.67 |
| Peltonen, Ellonen, Poso, & Lucas (2014)                   | 2 | 2 | 0 | 0 | 1 | na | 2 | 7  | 14 | 50.00 |
| Pereira et al. (2012)                                     | 1 | 2 | 1 | 1 | 1 | 1  | 2 | 9  | 15 | 60.00 |
| Rea & Shaffer (2016)                                      | 1 | 1 | 1 | 1 | 3 | 1  | 2 | 10 | 15 | 66.67 |
| Roberts, O'Connor, Dunn, & Golding (2004)                 | 1 | 2 | 0 | 1 | 1 | 1  | 2 | 8  | 15 | 53.33 |
| Rodriguez & Tucker (2011)                                 | 1 | 2 | 1 | 0 | 1 | na | 2 | 7  | 14 | 50.00 |
| Ruscio (2001)                                             | 1 | 2 | 1 | 1 | 1 | 1  | 2 | 9  | 15 | 60.00 |
| Schuetze & Eiden (2005)                                   | 1 | 1 | 1 | 0 | 1 | 1  | 2 | 7  | 15 | 46.67 |
| Schwerdtfeger, Larzelere, Werner, Peters, & Oliver (2013) | 1 | 2 | 1 | 1 | 1 | na | 2 | 8  | 14 | 57.14 |
| Seltmann & Wright (2013)                                  | 1 | 2 | 0 | 0 | 1 | 1  | 1 | 6  | 15 | 40.00 |
| Sexton, Davis, Menke, Raggio, & Muzik (2017)              | 1 | 1 | 1 | 1 | 3 | na | 1 | 8  | 14 | 57.14 |

|                                                      |   |   |   |   |   |    |   |    |    |        |
|------------------------------------------------------|---|---|---|---|---|----|---|----|----|--------|
| Simons, Whitbeck, Conger, & Wu (1991)                | 1 | 2 | 0 | 0 | 0 | 1  | 2 | 6  | 15 | 40.00  |
| Spieker, Oxford, Fleming, & Lohr (2018)              | 1 | 2 | 1 | 1 | 3 | na | 2 | 10 | 14 | 71.43  |
| Testa, Hoffman, & Livingston (2011)                  | 1 | 2 | 1 | 0 | 1 | na | 2 | 7  | 14 | 50.00  |
| Thompson-Booth et al. (2018)                         | 1 | 2 | 1 | 1 | 3 | 1  | 2 | 11 | 15 | 73.33  |
| Umeda, Kawakami, Kessler, & Miller (2015)            | 1 | 2 | 1 | 1 | 1 | na | 2 | 8  | 14 | 57.14  |
| Widom, Czaja, & DuMont (2015)                        | 3 | 2 | 3 | 1 | 3 | na | 2 | 14 | 14 | 100.00 |
| Wright, Fopma-Loy, & Fischer (2005)                  | 1 | 2 | 0 | 0 | 1 | 1  | 2 | 7  | 15 | 46.67  |
| Zajac, Raby, & Dozier (2019)                         | 2 | 2 | 1 | 1 | 3 | na | 2 | 11 | 14 | 78.57  |
| Zalewski, Cyranowski, Cheng, & Swartz (2013)         | 1 | 2 | 1 | 1 | 2 | na | 2 | 9  | 14 | 64.29  |
| Zuravin & Fontanella (1999)                          | 1 | 2 | 0 | 1 | 1 | 1  | 2 | 8  | 15 | 53.33  |
| Zuravin & DiBlasio (1992)                            | 2 | 1 | 0 | 1 | 3 | na | 2 | 9  | 14 | 64.29  |
| Zvara, Meltzer-Brody, Mills-Koonce, & Cox (2017)     | 2 | 2 | 1 | 1 | 3 | 1  | 2 | 12 | 15 | 80.00  |
| Zvara, Mills-Koonce, & Cox (2017)                    | 2 | 2 | 1 | 0 | 3 | 1  | 2 | 11 | 15 | 73.33  |
| Zvara, Mills-Koonce, Appleyard Carmody, & Cox (2015) | 2 | 2 | 1 | 1 | 3 | 1  | 2 | 12 | 15 | 80.00  |
